# Supplementary material
Source: bioRxiv or medRxiv preprint supplement (http://medrxiv.org/highwire/filestream/85064/field_highwire_adjunct_files/3/2020.06.08.20124834-4.pdf)

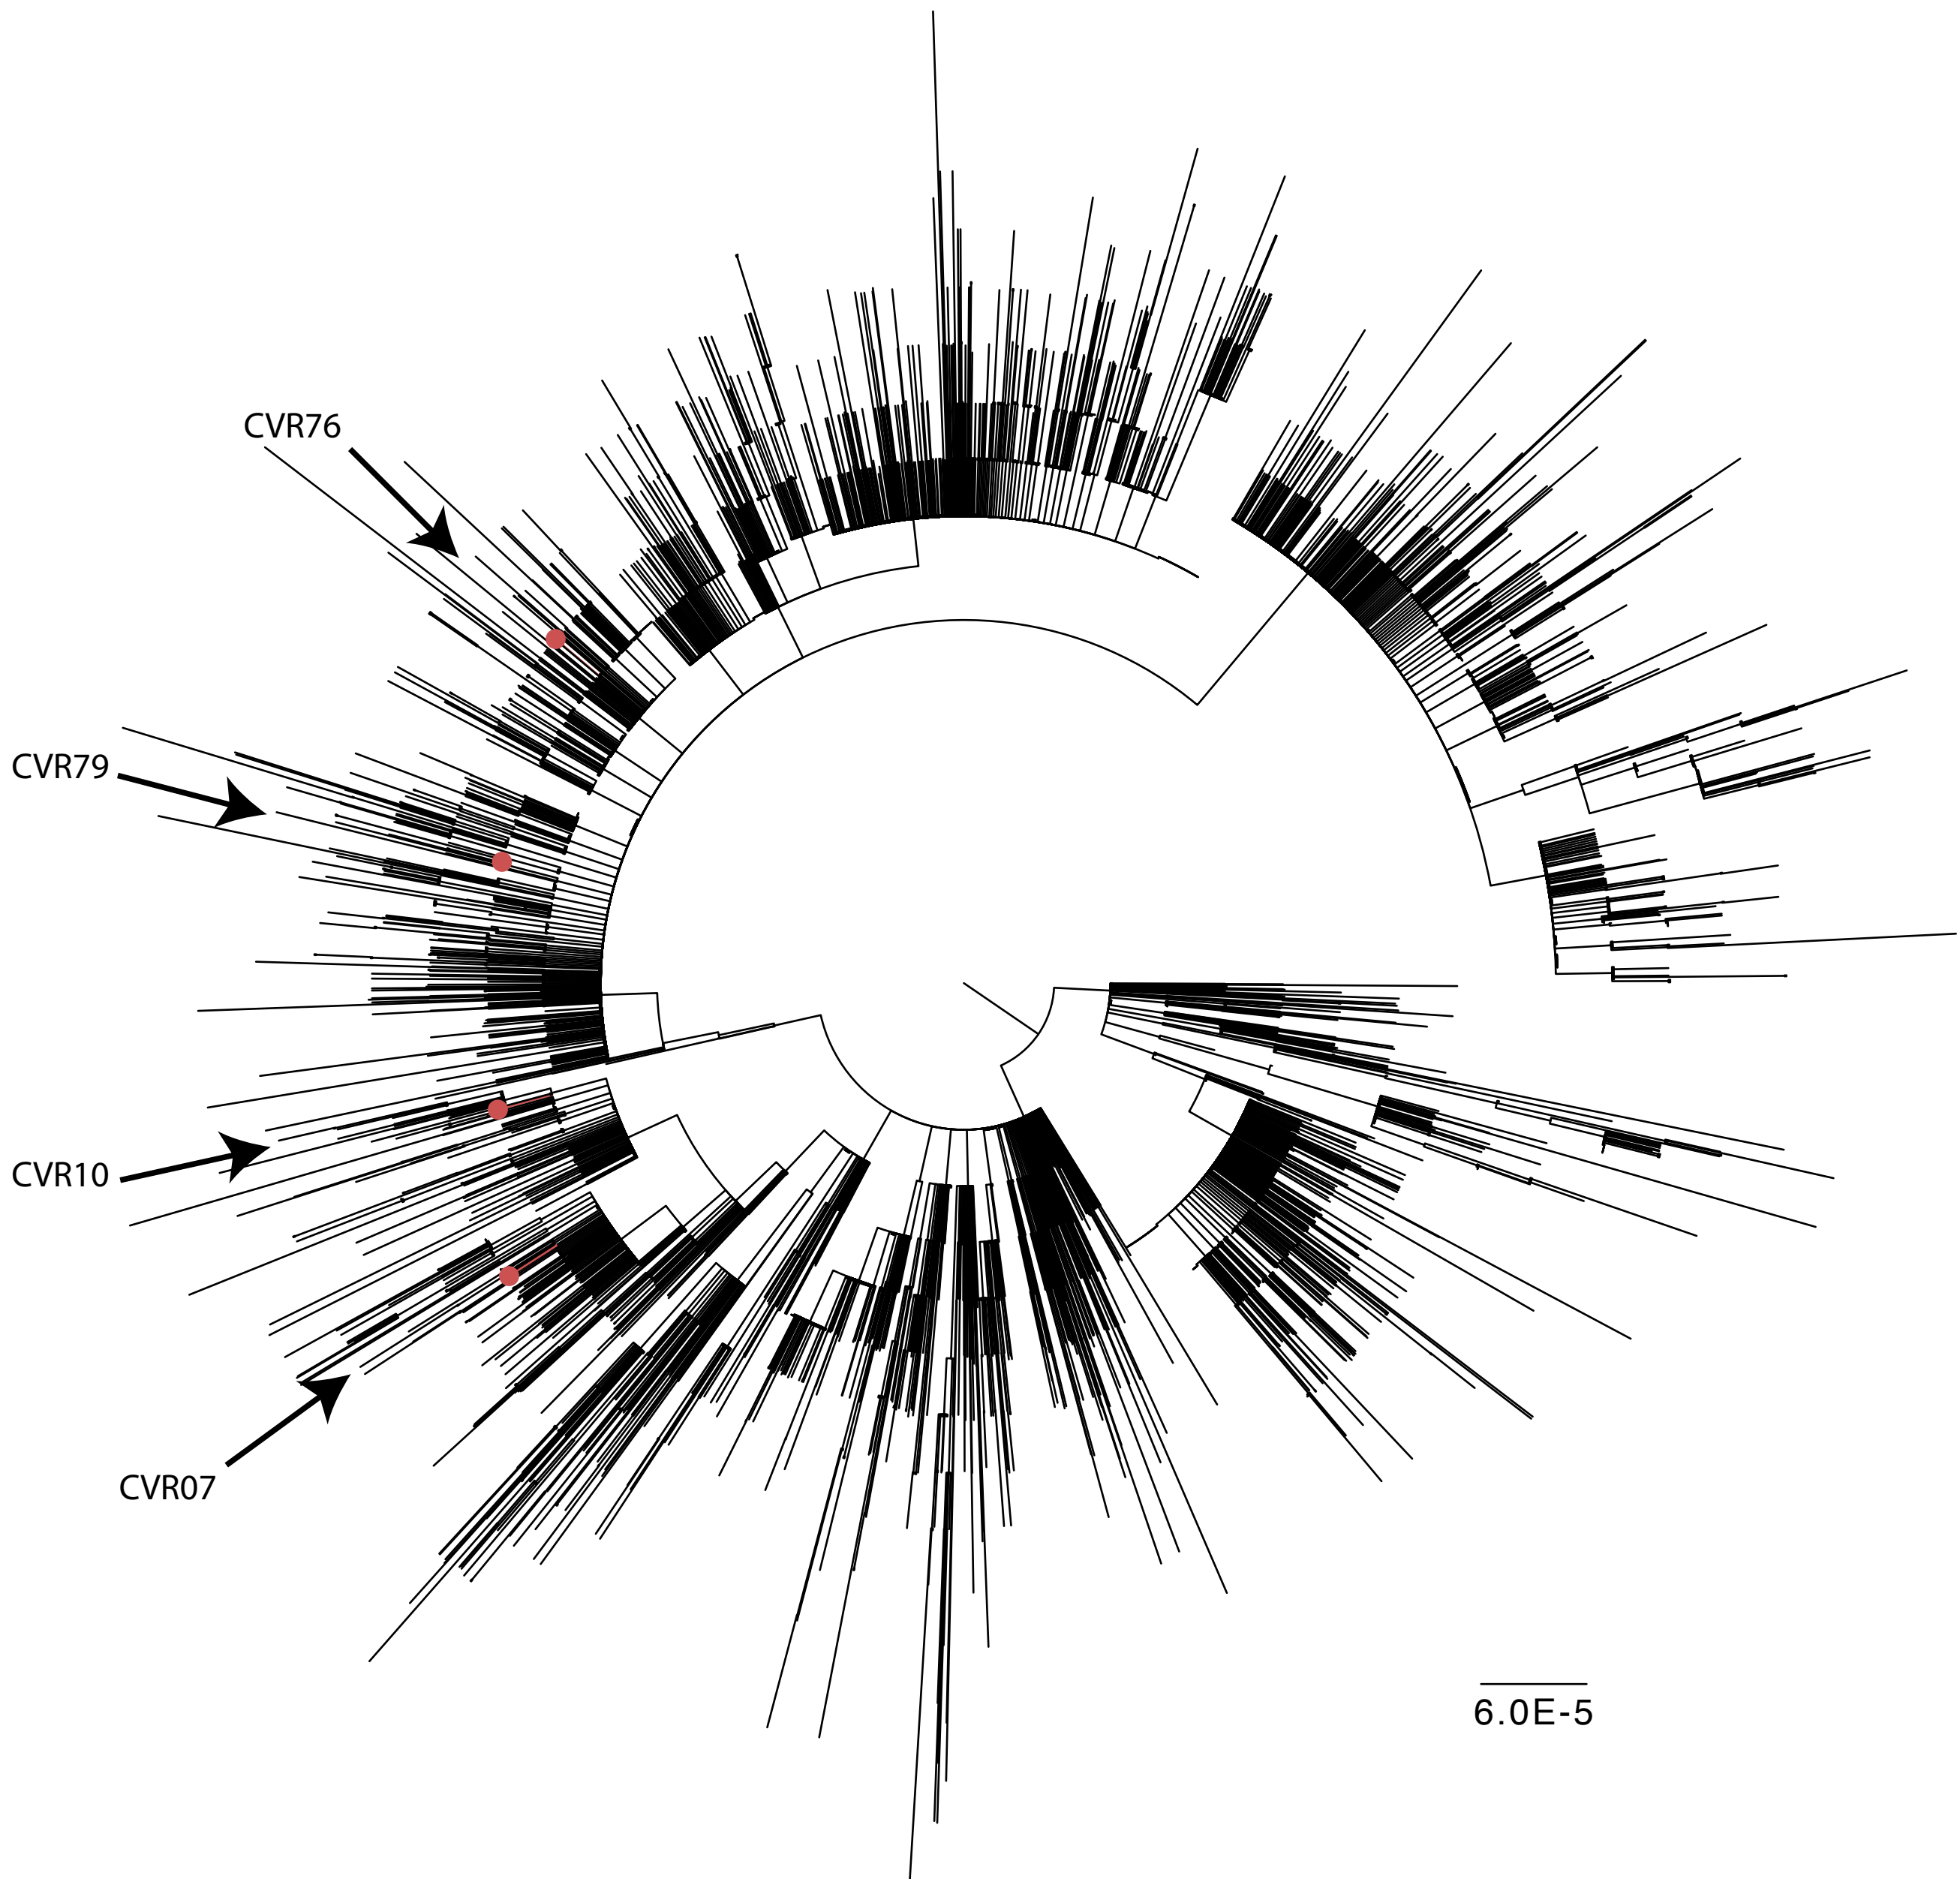

Supplement: Supplementary file [file 2020.06.08.20124834-4.pdf]
